# Supplementary material for: On Docking, Scoring and Assessing Protein-DNA Complexes in a Rigid-Body Framework
Source: PLOS journal article supplement (doi:10.1371/journal.pone.0032647), 2012-02-29
Supplement: S2 (10.1371/journal.pone.0032647.s002) [file journal.pone.0032647.s002.pdf › journal.pone.0032647.s002.pdf]

**a**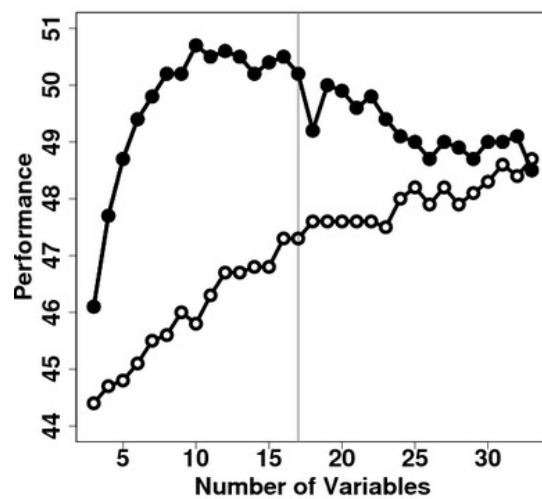**b**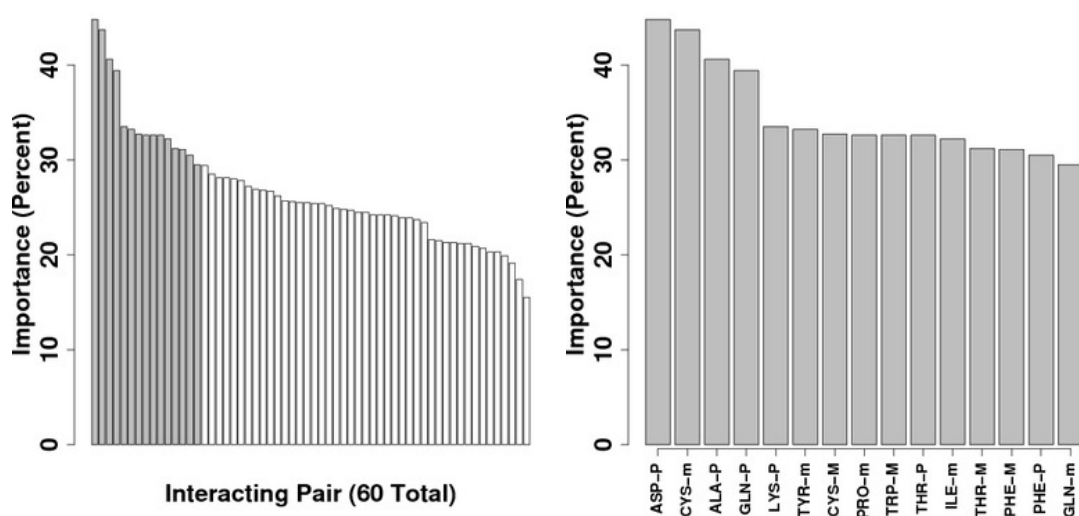

Figure S2
