# Supplementary material for: On Docking, Scoring and Assessing Protein-DNA Complexes in a Rigid-Body Framework
Source: PLOS journal article supplement (doi:10.1371/journal.pone.0032647), 2012-02-29
Supplement: S3 (10.1371/journal.pone.0032647.s003) [file journal.pone.0032647.s003.pdf › journal.pone.0032647.s003.pdf]

|      |      |      |      |
|------|------|------|------|
| 1a74 | 1f4k | 1pt3 | 1zme |
| 1azp | 1fok | 1qne | 1zs4 |
| 1b3t | 1g9z | 1qrv | 2c5r |
| 1bdt | 1h9t | 1r4o | 2fio |
| 1by4 | 1hjc | 1rpe | 2fl3 |
| 1cma | 1jj4 | 1rva | 2irf |
| 1ddn | 1jt0 | 1tro | 2oaa |
| 1dfm | 1k79 | 1vas | 3bam |
| 1diz | 1kc6 | 1vrr | 3cro |
| 1ea4 | 1ksy | 1w0t | 4ktq |
| 1emh | 1mn  | 1z63 | 7mht |
| 1eyu | 1o3t | 1z9c |      |

Table S1
