# Supplementary material for: On Docking, Scoring and Assessing Protein-DNA Complexes in a Rigid-Body Framework
Source: PLOS journal article supplement (doi:10.1371/journal.pone.0032647), 2012-02-29
Supplement: S4 (10.1371/journal.pone.0032647.s004) [file journal.pone.0032647.s004.pdf › journal.pone.0032647.s004.pdf]

|      |      |      |
|------|------|------|
| 1a74 | 1f4k | 1pt3 |
| 1azp | 1fok | 1qne |
| 1b3t | 1g9z | 1qrv |
| 1bdt | 1h9t | 1r4o |
| 1by4 | 1hjc | 1rpe |
| 1cma | 1jj4 | 1rva |
| 1ddn | 1jt0 | 1tro |
| 1dfm | 1k79 | 1vas |
| 1diz | 1kc6 | 1vrr |
| 1ea4 | 1ksy | 1w0t |
| 1emh | 1mnn |      |
| 1eyu | 1o3t |      |

Table S2
