# Supplementary material for: On Docking, Scoring and Assessing Protein-DNA Complexes in a Rigid-Body Framework
Source: PLOS journal article supplement (doi:10.1371/journal.pone.0032647), 2012-02-29
Supplement: S5 (10.1371/journal.pone.0032647.s005) [file journal.pone.0032647.s005.pdf › journal.pone.0032647.s005.pdf]

|        |        |        |        |
|--------|--------|--------|--------|
| 1ayo-A | 1ekj-A | 1j77-A | 1rhc-A |
| 1d2z-B | 1em8-B | 1jnd-A | 1u8v-A |
| 1dc1-A | 1epa-A | 1jos-A | 1vjz-A |
| 1dek-A | 1esw-A | 1k4n-A | 1xmx-A |
| 1dkq-A | 1fp1-D | 1kap-P | 1ynf-A |
| 1dqp-A | 1fye-A | 1lc0-A | 2c12-A |
| 1dqz-A | 1h32-A | 1oyg-A | 2cdu-A |
| 1e0c-A | 1hx6-A | 1p1x-A | 2dsk-A |
| 1ecs-A | 1iap-A | 1qop-B | 2q4g-W |
| 1ej8-A | 1iuq-A | 1r0m-A | 2yqc-A |

Table S3
