# Supplementary material for: On Docking, Scoring and Assessing Protein-DNA Complexes in a Rigid-Body Framework
Source: PLOS journal article supplement (doi:10.1371/journal.pone.0032647), 2012-02-29
Supplement: S6 (10.1371/journal.pone.0032647.s006) [file journal.pone.0032647.s006.pdf › journal.pone.0032647.s006.pdf]

|        |        |        |        |
|--------|--------|--------|--------|
| 16vp-A | 1jy1-A | 1qcs-A | 2iw1-A |
| 1b7g-O | 1jzt-A | 1ro2-A | 2jlq-A |
| 1btk-A | 1l8r-A | 1ru4-A | 2nt0-A |
| 1d3g-A | 1lm8-V | 1vky-A | 2q62-A |
| 1dow-A | 1mnn-A | 1wly-A | 2qgm-A |
| 1eg3-A | 1mww-A | 1x9i-A | 2zsj-A |
| 1eyb-A | 1nep-A | 2b3f-A | 3bnj-A |
| 1fo8-A | 1ofl-A | 2b4v-A | 3hsi-A |
| 1i4j-A | 1oyz-A | 2bem-A |        |
| 1j1n-A | 1p4x-A | 2dxu-A |        |
| 1jb7-A | 1q40-B | 2g64-A |        |

Table S4
