# Supplementary material for: On Docking, Scoring and Assessing Protein-DNA Complexes in a Rigid-Body Framework
Source: PLOS journal article supplement (doi:10.1371/journal.pone.0032647), 2012-02-29
Supplement: S7 (10.1371/journal.pone.0032647.s007) [file journal.pone.0032647.s007.pdf › journal.pone.0032647.s007.pdf]

| AA  | Atom | <e> (Å) | AA  | Atom | <e> (Å) |
|-----|------|---------|-----|------|---------|
| ALA | CB   | 0.00    | LEU | CD1  | 2.53    |
| ARG | NH1  | 5.28    | LYS | NZ   | 5.07    |
| ASN | OD1  | 2.42    | MET | CE   | 3.87    |
| ASP | OD1  | 2.42    | PHE | CZ   | 4.33    |
| CYS | SG   | 1.84    | PRO | CG   | 1.52    |
| GLN | OE1  | 3.42    | SER | OG   | 1.48    |
| GLU | OE1  | 3.37    | THR | OG1  | 1.47    |
| GLY | -    | 0.00    | TRP | CH2  | 5.41    |
| HIS | CE1  | 3.65    | TYR | OH   | 5.72    |
| ILE | CD1  | 2.61    | VAL | CG1  | 1.54    |

Table S5
