# Supplementary material for: On Docking, Scoring and Assessing Protein-DNA Complexes in a Rigid-Body Framework
Source: PLOS journal article supplement (doi:10.1371/journal.pone.0032647), 2012-02-29
Supplement: S8 (10.1371/journal.pone.0032647.s008) [file journal.pone.0032647.s008.pdf › journal.pone.0032647.s008.pdf]

| PDB     | B/B   | S/B   | U/B   | B/U   | U/U   | Level        |
|---------|-------|-------|-------|-------|-------|--------------|
| 1A74    | 5.67  | 5.98  | 4.76  | 14.37 | 14.87 | Intermediate |
| 1AZP    | 2.48  | 2.29  | 5.41  | 9.18  | 7.67  | Intermediate |
| 1B3T    | 3.94  | 14.08 | 23.46 | 22.72 | 12.43 | Difficult    |
| 1BDT    | 3.06  | 2.97  | 8.48  | 9.02  | 9.86  | Difficult    |
| 1BY4    | 3.33  | 3.28  | 13.14 | 6.45  | 9.14  | Easy         |
| 1CMA    | 3.87  | 7.35  | 9.20  | 8.76  | 6.51  | Intermediate |
| 1DDN    | 4.86  | 21.27 | 21.22 | 19.44 | 18.70 | Intermediate |
| 1DFM    | 3.35  | 18.56 | 24.73 | 13.68 | 21.97 | Difficult    |
| 1DIZ    | 3.29  | 3.42  | 7.93  | 8.22  | 7.81  | Easy         |
| 1EA4    | 3.20  | 6.15  | 7.71  | 8.68  | 9.44  | Intermediate |
| 1EMH    | 4.59  | 4.80  | 6.05  | 5.46  | 6.53  | Easy         |
| 1EYU    | 3.29  | 3.57  | 9.40  | 19.32 | 5.76  | Difficult    |
| 1F4K    | 2.79  | 2.46  | 13.39 | 12.88 | 7.63  | Intermediate |
| 1FOK    | 4.02  | 4.35  | 8.62  | 12.48 | 12.59 | Easy         |
| 1G9Z    | 3.81  | 7.55  | 18.04 | 19.09 | 10.38 | Intermediate |
| 1H9T    | 4.91  | 5.01  | 3.86  | 14.12 | 12.52 | Easy         |
| 1HJC    | 2.60  | 3.81  | 6.64  | 5.05  | 6.35  | Easy         |
| 1JJ4    | 3.32  | 7.01  | 7.79  | 10.59 | 10.09 | Intermediate |
| 1JT0    | 6.32  | 13.35 | 18.29 | 17.12 | 12.81 | Intermediate |
| 1K79    | 2.36  | 5.15  | 17.24 | 17.39 | 10.26 | Intermediate |
| 1KC6    | 3.16  | 3.20  | 11.09 | 29.99 | 27.34 | Intermediate |
| 1KSY    | 7.87  | 5.04  | 7.01  | 7.34  | 4.39  | Easy         |
| 1MNN    | 3.64  | 7.65  | 10.83 | 10.49 | 5.10  | Easy         |
| 1O3T    | 6.06  | 9.74  | 13.16 | 14.84 | 12.42 | Difficult    |
| 1PT3    | 2.77  | 3.89  | 8.97  | 9.76  | 6.52  | Easy         |
| 1QNE    | 2.51  | 2.58  | 3.04  | 9.19  | 10.00 | Intermediate |
| 1QRV    | 2.93  | 2.92  | 14.27 | 10.15 | 12.86 | Difficult    |
| 1R4O    | 2.45  | 6.05  | 11.20 | 11.44 | 5.89  | Intermediate |
| 1RPE    | 2.42  | 2.69  | 4.58  | 3.98  | 5.71  | Easy         |
| 1RVA    | 3.51  | 20.55 | 22.62 | 21.88 | 21.22 | Difficult    |
| 1TRO    | 3.07  | 3.16  | 8.14  | 9.23  | 5.99  | Easy         |
| 1VAS    | 2.41  | 3.79  | 3.64  | 7.93  | 7.88  | Intermediate |
| 1VRR    | 3.32  | 3.31  | 18.41 | 17.03 | 10.17 | Intermediate |
| 1W0T    | 3.17  | 3.63  | 10.58 | 6.10  | 12.09 | Intermediate |
| 1Z63    | 10.79 | 10.91 | 19.91 | 20.44 | 10.57 | Intermediate |
| 1Z9C    | 3.32  | 7.40  | 4.35  | 5.07  | 11.71 | Intermediate |
| 1ZME    | 3.49  | 3.52  | 21.78 | 18.27 | 14.64 | Difficult    |
| 1ZS4    | 3.84  | 6.04  | 22.25 | 21.39 | 14.59 | Intermediate |
| 2C5R    | 9.70  | 9.01  | 11.28 | 9.76  | 9.54  | Easy         |
| 2FIO    | 11.79 | 12.13 | 18.83 | 19.84 | 11.64 | Intermediate |
| 2FL3    | 2.97  | 3.02  | 14.39 | 19.68 | 3.39  | Difficult    |
| 2IRF    | 2.37  | 2.28  | 11.01 | 8.64  | 5.24  | Intermediate |
| 2OAA    | 2.92  | 3.01  | 11.79 | 20.55 | 5.47  | Difficult    |
| 3BAM    | 3.59  | 3.71  | 20.58 | 18.50 | 15.23 | Difficult    |
| 3CRO    | 2.45  | 2.84  | 4.25  | 3.89  | 3.91  | Easy         |
| 4KTQ    | 3.92  | 8.15  | 11.89 | 13.48 | 10.13 | Intermediate |
| 7MHT    | 3.40  | 6.53  | 6.47  | 12.10 | 7.42  | Difficult    |
| Average | 4.02  | 6.37  | 11.95 | 13.08 | 10.31 |              |

Table S6
