# Supplementary material for: On Docking, Scoring and Assessing Protein-DNA Complexes in a Rigid-Body Framework
Source: PLOS journal article supplement (doi:10.1371/journal.pone.0032647), 2012-02-29
Supplement: S9 (10.1371/journal.pone.0032647.s009) [file journal.pone.0032647.s009.pdf › journal.pone.0032647.s009.pdf]

| PDB     | RMSD  | CCP   | D-S   | C-S   | Level        |
|---------|-------|-------|-------|-------|--------------|
| 1A74    | 5.67  | 1.43  | 1.43  | 22.59 | Intermediate |
| 1AZP    | 2.48  | 2.38  | 1.24  | 18.73 | Intermediate |
| 1B3T    | 3.94  | 1.43  | 1.43  | 1.43  | Difficult    |
| 1BDT    | 3.06  | 1.32  | 1.32  | 1.32  | Difficult    |
| 1BY4    | 3.33  | 1.51  | 1.46  | 14.66 | Easy         |
| 1CMA    | 3.87  | 26.50 | 34.31 | 28.83 | Intermediate |
| 1DDN    | 4.86  | 1.79  | 1.68  | 1.83  | Intermediate |
| 1DFM    | 3.35  | 3.41  | 4.24  | 3.49  | Difficult    |
| 1DIZ    | 3.29  | 28.26 | 42.01 | 36.55 | Easy         |
| 1EA4    | 3.20  | 1.24  | 1.24  | 1.24  | Intermediate |
| 1EMH    | 4.59  | 27.47 | 8.43  | 28.63 | Easy         |
| 1EYU    | 3.29  | 3.56  | 1.71  | 3.39  | Difficult    |
| 1F4K    | 2.79  | 1.55  | 1.55  | 31.54 | Intermediate |
| 1FOK    | 4.02  | 43.12 | 1.79  | 5.89  | Easy         |
| 1G9Z    | 3.81  | 1.19  | 1.19  | 4.50  | Intermediate |
| 1H9T    | 4.91  | 1.66  | 1.66  | 1.76  | Easy         |
| 1HJC    | 2.60  | 8.02  | 8.02  | 2.39  | Easy         |
| 1JJ4    | 3.32  | 1.27  | 1.27  | 25.10 | Intermediate |
| 1JT0    | 6.32  | 1.32  | 1.32  | 6.24  | Intermediate |
| 1K79    | 2.36  | 1.74  | 2.27  | 2.76  | Intermediate |
| 1KC6    | 3.16  | 3.80  | 3.71  | 3.80  | Intermediate |
| 1KSY    | 7.87  | 1.52  | 15.21 | 45.66 | Easy         |
| 1MNN    | 3.64  | 1.70  | 1.70  | 1.70  | Easy         |
| 1O3T    | 6.06  | 5.84  | 1.42  | 5.93  | Difficult    |
| 1PT3    | 2.77  | 3.10  | 23.87 | 26.38 | Easy         |
| 1QNE    | 2.51  | 1.59  | 1.59  | 33.18 | Intermediate |
| 1QRV    | 2.93  | 33.39 | 1.67  | 27.74 | Difficult    |
| 1R4O    | 2.45  | 1.82  | 1.94  | 14.76 | Intermediate |
| 1RPE    | 2.42  | 1.80  | 1.53  | 24.59 | Easy         |
| 1RVA    | 3.51  | 1.96  | 3.49  | 5.45  | Difficult    |
| 1TRO    | 3.07  | 1.70  | 1.70  | 38.38 | Easy         |
| 1VAS    | 2.41  | 1.28  | 1.28  | 26.25 | Intermediate |
| 1VRR    | 3.32  | 3.49  | 6.07  | 8.28  | Intermediate |
| 1W0T    | 3.17  | 1.79  | 1.85  | 2.91  | Intermediate |
| 1Z63    | 10.79 | 47.91 | 43.26 | 39.02 | Intermediate |
| 1Z9C    | 3.32  | 1.72  | 1.72  | 12.70 | Intermediate |
| 1ZME    | 3.49  | 1.40  | 1.40  | 47.00 | Difficult    |
| 1ZS4    | 3.84  | 1.47  | 1.47  | 29.79 | Intermediate |
| 2C5R    | 9.70  | 14.35 | 24.82 | 13.97 | Easy         |
| 2FIO    | 11.79 | 1.46  | 32.92 | 14.37 | Intermediate |
| 2FL3    | 2.97  | 1.59  | 2.95  | 22.53 | Difficult    |
| 2IRF    | 2.37  | 2.74  | 1.63  | 8.63  | Intermediate |
| 2OAA    | 2.92  | 3.01  | 1.45  | 31.68 | Difficult    |
| 3BAM    | 3.59  | 8.15  | 1.70  | 1.57  | Difficult    |
| 3CRO    | 2.45  | 1.28  | 1.28  | 1.33  | Easy         |
| 4KTQ    | 3.92  | 1.71  | 4.86  | 3.87  | Intermediate |
| 7MHT    | 3.40  | 1.63  | 1.63  | 40.94 | Difficult    |
| Average | 4.02  | 6.67  | 6.55  | 16.50 |              |

Table S7
