# Supplementary material for: On Docking, Scoring and Assessing Protein-DNA Complexes in a Rigid-Body Framework
Source: PLOS journal article supplement (doi:10.1371/journal.pone.0032647), 2012-02-29
Supplement: S10 (10.1371/journal.pone.0032647.s010) [file journal.pone.0032647.s010.pdf › journal.pone.0032647.s010.pdf]

| PDB          | FFT | CCP | D-S | C-S |
|--------------|-----|-----|-----|-----|
| Easy         |     |     |     |     |
| *2C5R        | ✓   |     |     |     |
| 1PT3         | ✓   | ✓   |     |     |
| 1MNN         | ✓   | ✓   | ✓   | ✓   |
| 1FOK         | ✓   |     | ✓   | ✓   |
| 1KSY         | ✓   | ✓   |     |     |
| *3CRO        | ✓   | ✓   | ✓   | ✓   |
| 1EMH         | ✓   |     | ✓   |     |
| 1H9T         | ✓   | ✓   | ✓   | ✓   |
| 1TRO         | ✓   | ✓   | ✓   |     |
| 1BY4         | ✓   | ✓   | ✓   |     |
| 1HJC         | ✓   | ✓   | ✓   | ✓   |
| 1DIZ         | ✓   |     |     |     |
| 1RPE         | ✓   | ✓   | ✓   |     |
| Intermediate |     |     |     |     |
| 1VRR         | ✓   | ✓   | ✓   | ✓   |
| 1F4K         | ✓   | ✓   | ✓   |     |
| 1K79         | ✓   | ✓   | ✓   | ✓   |
| 1KC6         | ✓   | ✓   | ✓   | ✓   |
| 1EA4         | ✓   | ✓   | ✓   | ✓   |
| *1Z63        |     |     |     |     |
| 1R4O         | ✓   | ✓   | ✓   |     |
| 1AZP         | ✓   | ✓   | ✓   |     |
| 1W0T         | ✓   | ✓   | ✓   | ✓   |
| 1CMA         | ✓   |     |     |     |
| 1JJ4         | ✓   | ✓   | ✓   |     |
| 1VAS         | ✓   | ✓   | ✓   |     |
| *4KTQ        | ✓   | ✓   | ✓   | ✓   |
| *1Z9C        | ✓   | ✓   | ✓   |     |
| 1DDN         | ✓   | ✓   | ✓   | ✓   |
| *2IRF        | ✓   | ✓   | ✓   | ✓   |
| 1JT0         | ✓   | ✓   | ✓   | ✓   |
| 1G9Z         | ✓   | ✓   | ✓   | ✓   |
| 1A74         | ✓   | ✓   | ✓   |     |
| *2FIO        |     | ✓   |     |     |
| 1QNE         | ✓   | ✓   | ✓   |     |
| *1ZS4        | ✓   | ✓   | ✓   |     |
| Difficult    |     |     |     |     |
| 1QRV         | ✓   |     | ✓   |     |
| 1O3T         | ✓   | ✓   | ✓   | ✓   |
| 1B3T         | ✓   | ✓   | ✓   | ✓   |
| *3BAM        | ✓   | ✓   | ✓   | ✓   |
| 1RVA         | ✓   | ✓   | ✓   | ✓   |
| *1ZME        | ✓   | ✓   | ✓   |     |
| 1DFM         | ✓   | ✓   | ✓   | ✓   |
| 1BDT         | ✓   | ✓   | ✓   | ✓   |
| *7MHT        | ✓   | ✓   | ✓   |     |
| *2FL3        | ✓   | ✓   | ✓   |     |
| 1EYU         | ✓   | ✓   | ✓   | ✓   |
| *2OAA        | ✓   | ✓   |     |     |

Table S8
